# Supplementary material for: A label-free and signal-on electrochemical aptasensor for ultrasensitive kanamycin detection based on exonuclease recycling cleavage
Source: Royal Society of Chemistry journal article supplement (doi:10.1039/c5ay02754c), 2015-12-02
Supplement: c5ay02754c1.pdf [file c5ay02754c1.pdf]

# Electronic Supplementary Information (ESI)

## For

### A Label-free and Signal-on Electrochemical Aptasensor for Ultrasensitive Kanamycin Detection based on Exonuclease Recycling Cleavage

Yuanyuan Xu,\* Linghao Sun, Xiaocui Huang, Yangyang Sun and Chenhe Lu

*Key Laboratory of Animal Physiology and Biochemistry, College of Veterinary Medicine, Nanjing*

*Agricultural University, Nanjing 210095, China.*

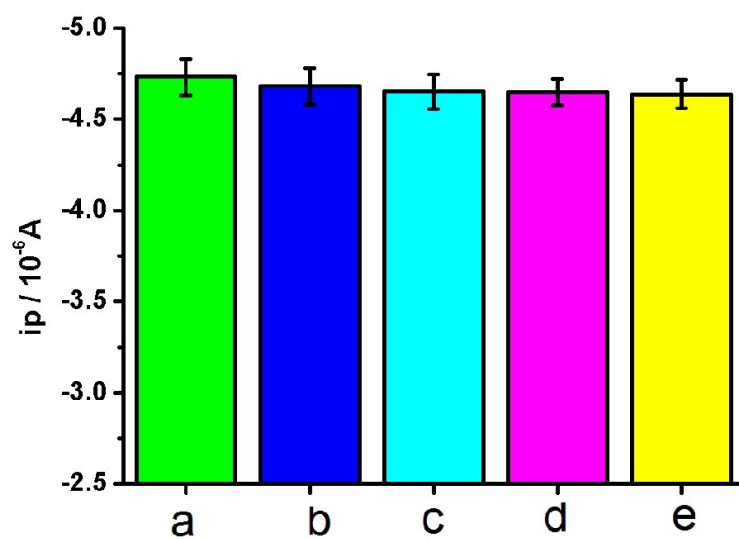

Figure S1. Histograms of peak values obtained by SWV corresponding to different conserved times of the aptasensor, when the concentration of Kan is 50 pM. (a) 0, (b) 3, (c) 7, (d) 14 and (e) 30 days.

Table S1. The comparison of the proposed method with ELISA assay. Mean values and RSDs were from three independent experiments.

|                                        |       |       |
|----------------------------------------|-------|-------|
| Kan added into the solution (nM)       | 10    | 50    |
| Mean value of the proposed method (nM) | 10.68 | 50.42 |
| RSD of the proposed method (%)         | 1.39  | 0.93  |
| Mean value of ELISA assay (nM)         | 10.28 | 50.71 |
| RSD of ELISA assay (%)                 | 2.36  | 1.27  |
